# Supplementary material for: Modulation of respiratory dendritic cells during Klebsiella pneumonia infection
Source: PubMed Central journal article supplement (PMC3848864; doi:10.1186/1465-9921-14-91), 2013-09-17
Supplement: 1465-9921-14-91-S2.pdf [file 1465-9921-14-91-S2.pdf]

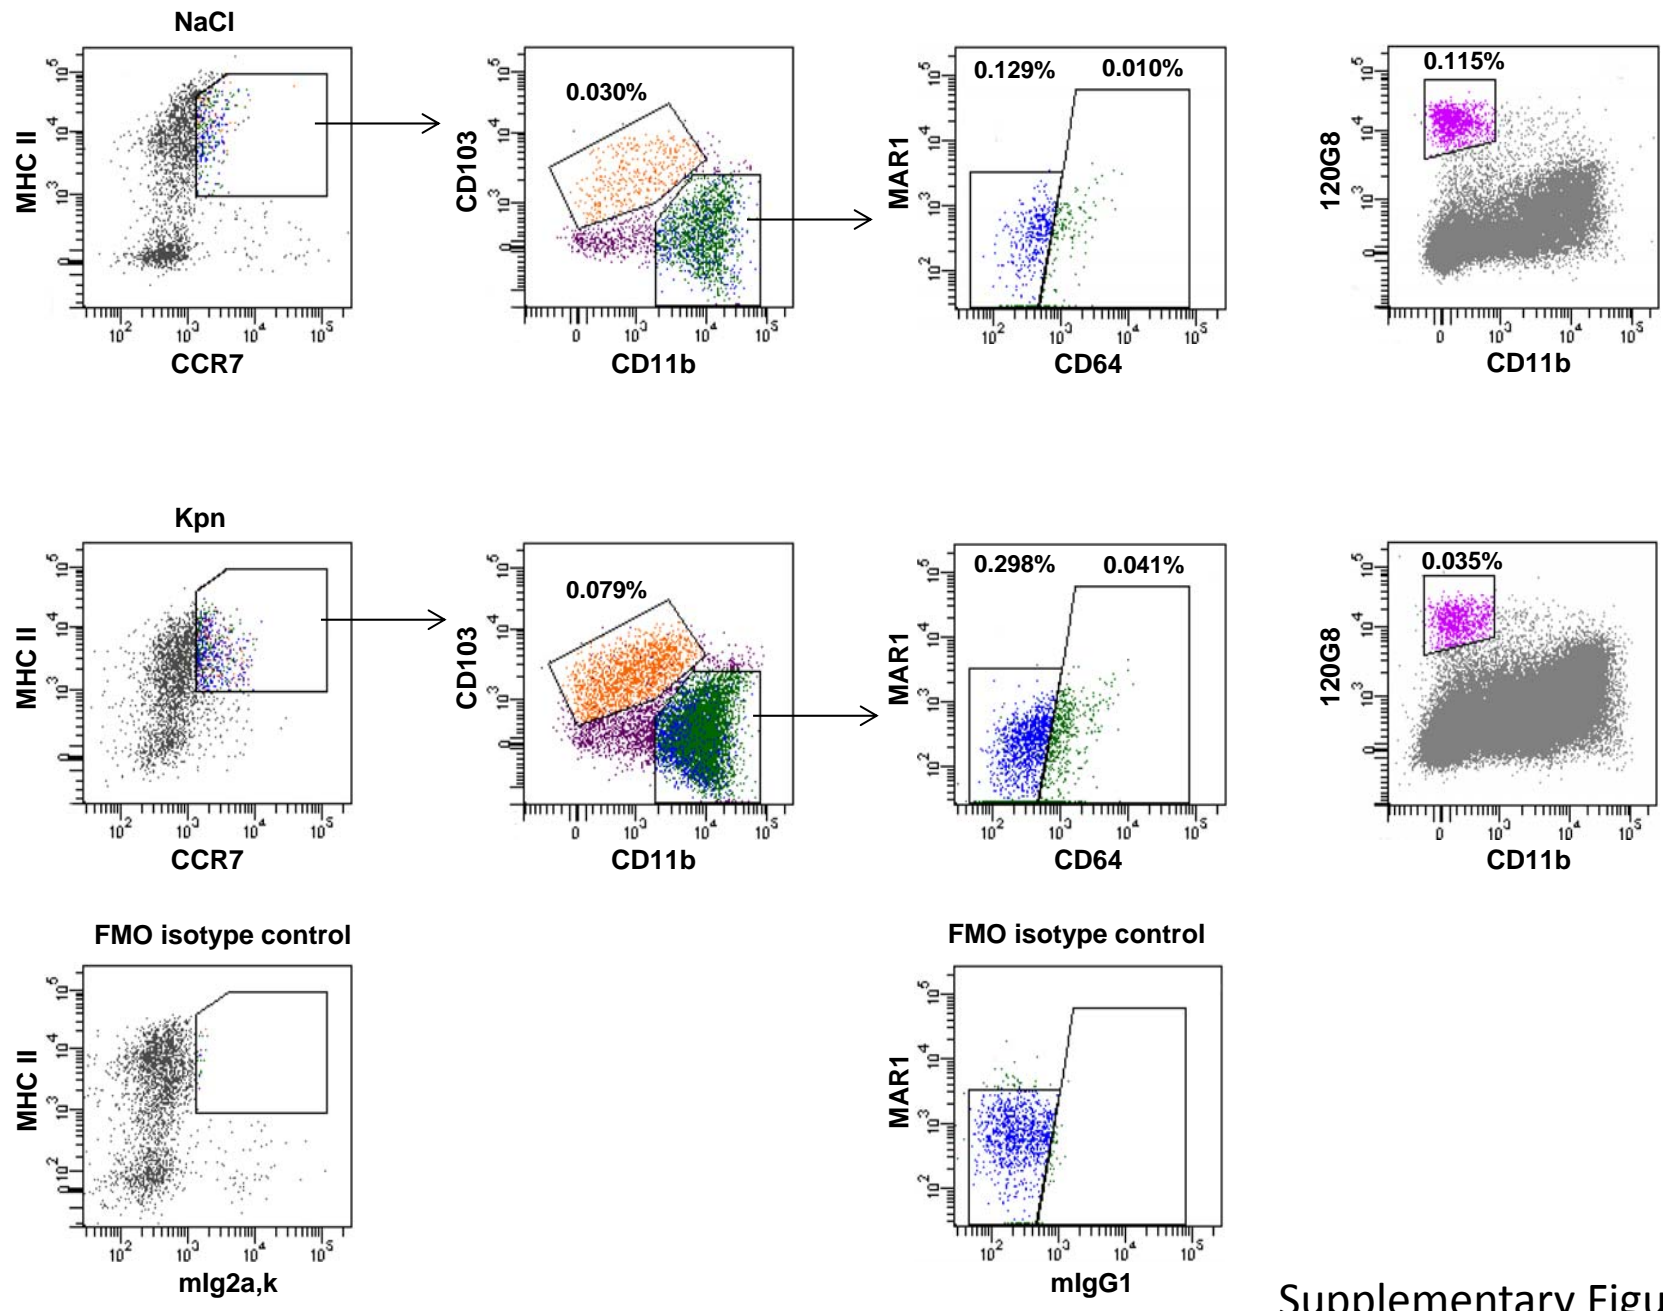

Supplementary Figure 2
